# Supplementary material for: Plasma metabolomics and proteomics profiling after a postprandial challenge reveal subtle diet effects on human metabolic status
Source: PubMed Central journal article supplement — Metabolomics. 2011 May 28;8(2):347–59. doi: 10.1007/s11306-011-0320-5 (PMC3291817; doi:10.1007/s11306-011-0320-5), 2011-05-28
Supplement: 11306_2011_320_MOESM1_ESM.pdf [file 11306_2011_320_MOESM1_ESM.pdf]

**Supplemental table 1. Identified plasma metabolites and proteins that significantly react upon a postprandial challenge, grouped according to 6 discrete time course profiles**

| Time course profile | #  | Parameter              |
|---------------------|----|------------------------|
| 1                   | 1  | 1,5-Anhydro-D-Glucitol |
|                     | 2  | C18:1 Glycerol ester   |
|                     | 3  | C16:0 Glycerol ester   |
|                     | 4  | 4-Deoxyglucose         |
|                     | 5  | C10:0 Fatty acid       |
|                     | 6  | D-glucose peak 1       |
|                     | 7  | Glutamic acid          |
|                     | 8  | alpha-Aminoadipic acid |
|                     | 9  | Lactose                |
|                     | 10 | D-glucose peak 2       |
|                     | 11 | Sucrose                |
|                     | 12 | D-Glucose <sup>#</sup> |
|                     | 13 | D-Glucose <sup>#</sup> |
|                     | 14 | D-glucose peak 3       |
|                     | 15 | Urea                   |
|                     | 16 | Total Triglycerides*   |
|                     | 17 | Glucose*               |
|                     | 18 | Apolipoprotein CIII    |
|                     | 19 | PYY                    |
| 2                   | 1  | N-carboxyproline       |

|  |    |                                   |
|--|----|-----------------------------------|
|  | 2  | 2-Hydroxybutanoic acid            |
|  | 3  | 2-Hydroxypiperidine               |
|  | 4  | 5-oxoproline #                    |
|  | 5  | 3-Amino-2-piperidinon             |
|  | 6  | 3-Methyl-2-oxo-valeric acid       |
|  | 7  | 3-Methylhistidine                 |
|  | 8  | 4-hydroxyglutamate semialdehyde # |
|  | 9  | 4-methyl-2-oxovaleric acid        |
|  | 10 | Alanine                           |
|  | 11 | alpha-Ketoglutaric acid           |
|  | 12 | Citric acid                       |
|  | 13 | Creatinine                        |
|  | 14 | Fructose                          |
|  | 15 | Glutamine degr. internal amide    |
|  | 16 | Asparagine                        |
|  | 17 | Glutamine                         |
|  | 18 | Histidine                         |
|  | 19 | Isoleucine                        |
|  | 20 | Leucine                           |
|  | 21 | Lysine                            |
|  | 22 | Methionine                        |
|  | 23 | Ornithine                         |
|  | 24 | Phenylalanine                     |
|  | 25 | Proline                           |

|   |    |                                   |
|---|----|-----------------------------------|
|   | 26 | Serine                            |
|   | 27 | Threonine                         |
|   | 28 | Tryptophan                        |
|   | 29 | Tyrosine                          |
|   | 30 | Valine                            |
|   | 31 | N-carboxyl-alanine                |
|   | 32 | Pyruvic acid                      |
|   | 33 | Sarcosine                         |
|   | 34 | Lysine                            |
|   | 35 | Glutamine #                       |
|   | 36 | 4-hydroxyglutamate semialdehyde # |
|   | 37 | Insulin*                          |
|   | 38 | GLP-1 active                      |
|   | 39 | Insulin                           |
|   | 40 | Pancreatic polypeptide            |
| 3 | 1  | 2,3,4-trihydroxybutanoic acid     |
|   | 2  | Aminomalonic acid                 |
|   | 3  | C22:6 Fatty acid                  |
|   | 4  | Cholesterol                       |
|   | 5  | Glycine                           |
|   | 6  | Hexadecanoic-methylester          |
|   | 7  | SM(d18:1/17:0)                    |
|   | 8  | SM(d18:2/24:0) & SM(18:2/24:1)    |
|   | 9  | Vitamin E                         |

|   |    |                             |
|---|----|-----------------------------|
|   | 10 | Apolipoprotein A1           |
|   | 11 | Apolipoprotein H            |
|   | 12 | Complement 3                |
|   | 13 | CTGF                        |
|   | 14 | EGF-R                       |
|   | 15 | Fibrinogen                  |
|   | 16 | Haptoglobin                 |
|   | 17 | IgA                         |
|   | 18 | Progesterone                |
|   | 19 | Serum Amyloid P             |
|   | 20 | SHBG                        |
|   | 21 | Tenascin C                  |
|   | 22 | Testosterone                |
|   | 23 | Thyroid Stimulating Hormone |
|   | 24 | Thyroxine Binding Globulin  |
| 4 | 1  | 2,4-Dihydroxybutanoic acid  |
|   | 2  | N-methyl-4-hydroxyproline   |
|   | 3  | Xylose                      |
|   | 4  | Erythronic acid             |
|   | 5  | Inositol                    |
|   | 6  | Arabinose                   |
|   | 7  | 4-Hydroxyproline            |
|   | 8  | Lactic acid                 |
|   | 9  | Meso-erythritol             |

|   |    |                           |
|---|----|---------------------------|
|   | 10 | Myo-inositol              |
|   | 11 | Pseudo uridine            |
|   | 12 | Lactic acid               |
|   | 13 | Uric acid                 |
|   | 14 | Cortisol                  |
|   | 15 | Factor VII                |
|   | 16 | MMP-2                     |
|   | 17 | TNF RII                   |
|   | 18 | VCAM-1                    |
| 5 | 1  | 2-Amino-1-butyric acid    |
|   | 2  | C12:0 Fatty acid          |
|   | 3  | C14:0 Fatty acid          |
|   | 4  | Monomethylphosphate       |
|   | 5  | Inositol cyclic phosphate |
|   | 6  | Myo-inositolphosphate     |
|   | 7  | sn-Glycerol-3-Phosphate   |
|   | 8  | Il-6*                     |
|   | 9  | EN-RAGE                   |
|   | 10 | MIP-1beta                 |
|   | 11 | MMP-9                     |
|   | 12 | Myeloperoxidase           |
| 6 | 1  | 3-Hydroxybutanoic acid    |
|   | 2  | Acetoacetic acid peak 1   |
|   | 3  | Acetoacetic acid peak 2   |

|  |    |                         |
|--|----|-------------------------|
|  | 4  | Arachidonic acid        |
|  | 5  | Beta-Alanine            |
|  | 6  | C16:0 fatty acid        |
|  | 7  | C16:1 fatty acid        |
|  | 8  | C17:0 Fatty acid        |
|  | 9  | C18:0 fatty acid        |
|  | 10 | C18:1 fatty acid        |
|  | 11 | C18:2 fatty acid        |
|  | 12 | Mannose                 |
|  | 13 | C18:2 LPC               |
|  | 14 | Glycerol                |
|  | 15 | Succinic acid           |
|  | 16 | Total Free Fatty Acids* |
|  | 17 | IL-8                    |
|  | 18 | MDC                     |

\* Clinical chemistry markers

# Annotated metabolites, but not confirmed by measuring reference substances
