# Supplementary material for: Plasma metabolomics and proteomics profiling after a postprandial challenge reveal subtle diet effects on human metabolic status
Source: PubMed Central journal article supplement — Metabolomics. 2011 May 28;8(2):347–59. doi: 10.1007/s11306-011-0320-5 (PMC3291817; doi:10.1007/s11306-011-0320-5), 2011-05-28
Supplement: 11306_2011_320_MOESM2_ESM.pdf [file 11306_2011_320_MOESM2_ESM.pdf]

**Supplemental table 2:**  
**Overview of metabolites and proteins analyzed during the high fat prandial challenge test**  
GCMS metabolic profiling platform nr 1  
Multiplex proteome analyses platform nr 2  
Clinical chemistry platform nr 3

| #  | ID                             | abbreviation | link                                                                                      | Pif |
|----|--------------------------------|--------------|-------------------------------------------------------------------------------------------|-----|
| 1  | unknown 1                      |              |                                                                                           | 1   |
| 2  | Hexadecanoic-methylester       |              |                                                                                           | 1   |
| 3  | C22:6 Fatty acid               | DHA          | <a href="#">HMDB02183</a>                                                                 | 1   |
| 4  | 3-Methylhistidine              | 3m-His       | <a href="#">HMDB00479</a>                                                                 | 1   |
| 5  | Acetoacetic acid peak 1        |              | <a href="#">HMDB00060</a>                                                                 | 1   |
| 6  | 2,4-Dihydroxybutanoic acid     |              | <a href="#">HMDB00360</a>                                                                 | 1   |
| 7  | Xylose                         | Xyl          | <a href="#">HMDB00098</a>                                                                 | 1   |
| 8  | Arabinose                      |              | <a href="#">HMDB00646</a>                                                                 | 1   |
| 9  | Arabitol, Ribitol, or Xylitol  |              | <a href="#">HMDB01851_or</a><br><a href="#">HMDB00508_or</a><br><a href="#">HMDB02917</a> | 1   |
| 10 | Ribose                         |              | <a href="#">HMDB00283</a>                                                                 | 1   |
| 11 | Arachidonic acid               | AA           | <a href="#">HMDB01043</a>                                                                 | 1   |
| 12 | Acetoacetic acid peak 2        |              | <a href="#">HMDB00060</a>                                                                 | 1   |
| 13 | Alanine                        | Ala          | <a href="#">HMDB00161</a>                                                                 | 1   |
| 14 | Sarcosine                      | Sar          | <a href="#">HMDB00271</a>                                                                 | 1   |
| 15 | Asparagine                     | Asn          | <a href="#">HMDB00168</a>                                                                 | 1   |
| 16 | unknown 2                      |              |                                                                                           | 1   |
| 17 | Lactic acid                    |              | <a href="#">HMDB00190_or</a><br><a href="#">HMDB01311</a>                                 | 1   |
| 18 | unknown 3                      |              |                                                                                           | 1   |
| 19 | C16:0 fatty acid               | C16:0 FA     | <a href="#">HMDB00220</a>                                                                 | 1   |
| 20 | C17:0 Fatty acid               | C17:0 FA     | <a href="#">HMDB02259</a>                                                                 | 1   |
| 21 | C18:0 fatty acid               | C18:0 FA     | <a href="#">HMDB00827</a>                                                                 | 1   |
| 22 | 3-Amino-2-piperidinon          |              | <a href="#">HMDB00323</a>                                                                 | 1   |
| 23 | 2-Amino-1-butyric acid         |              | <a href="#">HMDB00452</a>                                                                 | 1   |
| 24 | 2-Hydroxybutanoic acid         |              | <a href="#">HMDB00008</a>                                                                 | 1   |
| 25 | unknown 4                      |              |                                                                                           | 1   |
| 26 | Stearoylamide                  |              |                                                                                           | 1   |
| 27 | Proline                        | Pro          | <a href="#">HMDB00162</a>                                                                 | 1   |
| 28 | N-carboxyproline               |              |                                                                                           | 1   |
| 29 | Ornithine                      | Orn          | <a href="#">HMDB00214</a>                                                                 | 1   |
| 30 | Valine                         | Val          | <a href="#">HMDB00883</a>                                                                 | 1   |
| 31 | 2-Hydroxyvaleric acid          |              | <a href="#">HMDB01863</a>                                                                 | 1   |
| 32 | Lactic acid                    |              | <a href="#">HMDB00190</a>                                                                 | 1   |
| 33 | Histidine                      | His          | <a href="#">HMDB00177</a>                                                                 | 1   |
| 34 | 2-Hydroxypiperidine            |              |                                                                                           | 1   |
| 35 | Glutamine degr. internal amide |              | <a href="#">HMDB02142</a>                                                                 | 1   |
| 36 | unknown 5                      |              |                                                                                           | 1   |
| 37 | Lysine                         | Lys          | <a href="#">HMDB00182</a>                                                                 | 1   |
| 38 | Glutamine                      | Gln          | <a href="#">HMDB02142</a>                                                                 | 1   |
| 39 | Leucine                        | Leu          | <a href="#">HMDB00687</a>                                                                 | 1   |
| 40 | Isoleucine                     | Ile          | <a href="#">HMDB00172</a>                                                                 | 1   |
| 41 | S-methyl-L-cysteine            |              | <a href="#">HMDB02108</a>                                                                 | 1   |
| 42 | N-methyl-4-hydroxyproline      |              |                                                                                           | 1   |
| 43 | Glycine                        | Gly          | <a href="#">HMDB00123</a>                                                                 | 1   |
| 44 | Beta-Alanine                   | B-ala        | <a href="#">HMDB00056</a>                                                                 | 1   |
| 45 | Lysine                         | Lys          | <a href="#">HMDB00182</a>                                                                 | 1   |
| 46 | Mannose                        | Man          | <a href="#">HMDB00169</a>                                                                 | 1   |
| 47 | Methionine                     |              | <a href="#">HMDB00696</a>                                                                 | 1   |
| 48 | unknown 6                      |              |                                                                                           | 1   |
| 49 | unknown 7                      |              |                                                                                           | 1   |
| 50 | Pyruvic acid                   |              | <a href="#">HMDB00243</a>                                                                 | 1   |
| 51 | Urea                           |              | <a href="#">HMDB00294</a>                                                                 | 1   |
| 52 | 3-Hydroxybutanoic acid         |              | <a href="#">HMDB00357</a>                                                                 | 1   |
| 53 | Phenylalanine                  |              | <a href="#">HMDB00159</a>                                                                 | 1   |
| 54 | 5-oxoproline?                  |              | <a href="#">HMDB00267</a>                                                                 | 1   |
| 55 | 3-Methyl-2-oxo-valeric acid    |              | <a href="#">HMDB00491</a>                                                                 | 1   |
| 56 | 4-methyl-2-oxovaleric acid     |              | <a href="#">HMDB00695</a>                                                                 | 1   |
| 57 | unknown 8                      |              |                                                                                           | 1   |
| 58 | Indole-3-propionic acid        |              | <a href="#">HMDB02302</a>                                                                 | 1   |
| 59 | Tryptophan                     | Trp          | <a href="#">HMDB00929</a>                                                                 | 1   |
| 60 | Glutamine?                     | Gln?         | <a href="#">HMDB00641</a>                                                                 | 1   |
| 61 | Serine                         | Ser          | <a href="#">HMDB00187</a>                                                                 | 1   |
| 62 | unknown 9                      |              |                                                                                           | 1   |
| 63 | Byproduct of glucose           |              |                                                                                           | 1   |
| 64 | Byproduct of glucose           |              |                                                                                           | 1   |
| 65 | Lactose                        |              | <a href="#">HMDB00186</a>                                                                 | 1   |
| 66 | Glycerol                       |              | <a href="#">HMDB00131</a>                                                                 | 1   |
| 67 | Meso-erythritol                |              | <a href="#">HMDB02994</a>                                                                 | 1   |
| 68 | 1,5-Anhydro-D-Glucitol         |              | <a href="#">HMDB02712</a>                                                                 | 1   |
| 69 | Glucose?                       | Glc?         | <a href="#">HMDB00122</a>                                                                 | 1   |
| 70 | Myo-inositol                   |              | <a href="#">HMDB00211</a>                                                                 | 1   |

|     |                                                                      |                                 |  |                                                                                                                                                           |   |
|-----|----------------------------------------------------------------------|---------------------------------|--|-----------------------------------------------------------------------------------------------------------------------------------------------------------|---|
| 71  | Pseudo uridine                                                       |                                 |  | <a href="#">HMDB00767</a>                                                                                                                                 | 1 |
| 72  | Threonine                                                            | Thr                             |  | <a href="#">HMDB00167</a>                                                                                                                                 | 1 |
| 73  | Aminomalonic acid                                                    |                                 |  | <a href="#">HMDB01147</a>                                                                                                                                 | 1 |
| 74  | Cysteine                                                             | Cys                             |  | <a href="#">HMDB00574</a>                                                                                                                                 | 1 |
| 75  | Tyrosine                                                             | Tyr                             |  | <a href="#">HMDB00158</a>                                                                                                                                 | 1 |
| 76  | L-Cystine                                                            |                                 |  | <a href="#">HMDB00192</a>                                                                                                                                 | 1 |
| 77  | unknown 10                                                           |                                 |  |                                                                                                                                                           | 1 |
| 78  | C16:0 lysophosphatidylcholine                                        | C16:0 LPC                       |  | <a href="#">HMDB10382</a>                                                                                                                                 | 1 |
| 79  | C18:2 lysophosphatidylcholine                                        | C18:2 LPC                       |  | <a href="#">HMDB10386</a>                                                                                                                                 | 1 |
| 80  | C18:0 lysophosphatidylcholine                                        | C18:0 LPC                       |  | <a href="#">HMDB10384</a>                                                                                                                                 | 1 |
| 81  | C10:0 Fatty acid                                                     | C10:0 FA                        |  | <a href="#">HMDB00511</a>                                                                                                                                 | 1 |
| 82  | 4-Hydroxyproline                                                     | HPro                            |  | <a href="#">HMDB00725</a>                                                                                                                                 | 1 |
| 83  | 4-Deoxyglucose                                                       |                                 |  |                                                                                                                                                           | 1 |
| 84  | N-carboxyl-alanine                                                   |                                 |  |                                                                                                                                                           | 1 |
| 85  | unknown 11                                                           |                                 |  |                                                                                                                                                           | 1 |
| 86  | Monomethylphosphate                                                  |                                 |  |                                                                                                                                                           | 1 |
| 87  | Unknown 12                                                           |                                 |  |                                                                                                                                                           | 1 |
| 88  | Indole-3-carboxaldehyde?                                             |                                 |  | <a href="#">HMDB00195</a>                                                                                                                                 | 1 |
| 89  | Glutamic acid                                                        | Glu                             |  | <a href="#">HMDB03339</a>                                                                                                                                 | 1 |
| 90  | Succinic acid                                                        |                                 |  | <a href="#">HMDB00254</a>                                                                                                                                 | 1 |
| 91  | unknown 13                                                           |                                 |  |                                                                                                                                                           | 1 |
| 92  | C12:0 Fatty acid                                                     | C12:0 FA                        |  | <a href="#">HMDB00638</a>                                                                                                                                 | 1 |
| 93  | alpha-Aminoadipic acid                                               | AADA                            |  | <a href="#">HMDB00510</a>                                                                                                                                 | 1 |
| 94  | unknown 14                                                           |                                 |  |                                                                                                                                                           | 1 |
| 95  | Citric acid                                                          |                                 |  | <a href="#">HMDB00094</a>                                                                                                                                 | 1 |
| 96  | unknown 15                                                           |                                 |  |                                                                                                                                                           | 1 |
| 97  | Spingomyelin (d16:1/16:0)                                            | SM(d16:1/16:0)                  |  |                                                                                                                                                           | 1 |
| 98  | Spingomyelin (d16:1/18:0)                                            | SM(d16:1/18:0)                  |  |                                                                                                                                                           | 1 |
| 99  | Spingomyelin (d16:1/20:0)                                            | SM(d16:1/20:0)                  |  |                                                                                                                                                           | 1 |
| 100 | Spingomyelin (d16:1/22:0)                                            | SM(d16:1/22:0)                  |  |                                                                                                                                                           | 1 |
| 101 | Spingomyelin (d16:1/24:1)                                            | SM(d16:1/24:1)                  |  |                                                                                                                                                           | 1 |
| 102 | C14:0 Fatty acid                                                     | C14:0 FA                        |  | <a href="#">HMDB00806</a>                                                                                                                                 | 1 |
| 103 | unknown 16                                                           |                                 |  |                                                                                                                                                           | 1 |
| 104 | alpha-Ketoglutaric acid                                              |                                 |  | <a href="#">HMDB00208</a>                                                                                                                                 | 1 |
| 105 | 4-hydroxyglutamate semialdehyde?                                     |                                 |  | <a href="#">HMDB06556</a>                                                                                                                                 | 1 |
| 106 | 4-hydroxyglutamate semialdehyde?                                     |                                 |  | <a href="#">HMDB06556</a>                                                                                                                                 | 1 |
| 107 | Erythronic acid                                                      |                                 |  | <a href="#">HMDB00613</a>                                                                                                                                 | 1 |
| 108 | 2,3,4-trihydroxybutanoic acid                                        |                                 |  | <a href="#">HMDB00613</a>                                                                                                                                 | 1 |
| 109 | Spingomyelin (d17:1/16:0)                                            | SM(d17:1/16:0)                  |  |                                                                                                                                                           | 1 |
| 110 | Spingomyelin (d17:1/18:0)                                            | SM(d17:1/18:0)                  |  |                                                                                                                                                           | 1 |
| 111 | Phosphate                                                            |                                 |  | <a href="#">HMDB01429</a>                                                                                                                                 | 1 |
| 112 | sn-Glycerol-3-Phosphate                                              |                                 |  | <a href="#">HMDB02722</a>                                                                                                                                 | 1 |
| 113 | Inositol cyclic phosphate                                            |                                 |  | <a href="#">HMDB01125</a>                                                                                                                                 | 1 |
| 114 | Fructose                                                             | Fruc                            |  | <a href="#">HMDB00660</a>                                                                                                                                 | 1 |
| 115 | Spingomyelin (d18:2/16:0)                                            | SM(d18:2/16:0)                  |  |                                                                                                                                                           | 1 |
| 116 | Spingomyelin (d18:2/18:0)                                            | SM(d18:2/18:0)                  |  |                                                                                                                                                           | 1 |
| 117 | Spingomyelin (d18:2/20:0)                                            | SM(d18:2/20:0)                  |  |                                                                                                                                                           | 1 |
| 118 | Spingomyelin (d18:2/24:0) & Spingomyelin (18:2/24:1)                 | SM(d18:2/24:0) & SM(18:2/24:1)  |  |                                                                                                                                                           | 1 |
| 119 | C16:1 fatty acid                                                     | C16:1 FA                        |  | <a href="#">HMDB03229</a> or<br><a href="#">HMDB02186</a> or<br><a href="#">HMDB10736</a>                                                                 | 1 |
| 120 | Spingomyelin (d18:1/16:0)                                            | SM(d18:1/16:0)                  |  | <a href="#">HMDB10169</a>                                                                                                                                 | 1 |
| 121 | Spingomyelin (d18:1/17:0)                                            | SM(d18:1/17:0)                  |  |                                                                                                                                                           | 1 |
| 122 | Spingomyelin (d18:1/18:0)                                            | SM(d18:1/18:0)                  |  | <a href="#">HMDB01348</a>                                                                                                                                 | 1 |
| 123 | Spingomyelin (d18:1/22:0)                                            | SM(d18:1/22:0)                  |  |                                                                                                                                                           | 1 |
| 124 | Spingomyelin (d18:1/23:0)                                            | SM(d18:1/23:0)                  |  |                                                                                                                                                           | 1 |
| 125 | Spingomyelin (d18:1/24:0) & Spingomyelin (d18:1/24:1)                | SM(d18:1/24:0) & SM(d18:1/24:1) |  |                                                                                                                                                           | 1 |
| 126 | Spingomyelin (d18:0/16:0)                                            | SM(d18:0/16:0)                  |  | <a href="#">HMDB10168</a>                                                                                                                                 | 1 |
| 127 | Inositol                                                             |                                 |  |                                                                                                                                                           | 1 |
| 128 | Myo-inositolphosphate                                                |                                 |  | <a href="#">HMDB00213</a>                                                                                                                                 | 1 |
| 129 | D-glucose                                                            | Glc                             |  | <a href="#">HMDB00122</a>                                                                                                                                 | 1 |
| 130 | Creatinine                                                           |                                 |  | <a href="#">HMDB00562</a>                                                                                                                                 | 1 |
| 131 | C18:2 fatty acid                                                     | C18:2 FA                        |  | <a href="#">HMDB00673</a> or<br><a href="#">HMDB06270</a> or<br><a href="#">HMDB03797</a> or<br><a href="#">HMDB00573</a> or<br><a href="#">HMDB05047</a> | 1 |
| 132 | C18:1 fatty acid                                                     | C18:1 FA                        |  | <a href="#">HMDB00207</a> or<br><a href="#">HMDB03231</a> or<br><a href="#">HMDB00573</a>                                                                 | 1 |
| 133 | Lysophosphatidic acid (0:0/16:0) or Lysophosphatidic acid (16:0/0:0) | LPA(0:0/16:0) or LPA(16:0/0:0)  |  | <a href="#">HMDB07849</a> or<br><a href="#">HMDB07853</a>                                                                                                 | 1 |
| 134 | Glucose?                                                             | Glc?                            |  | <a href="#">HMDB00122</a>                                                                                                                                 | 1 |
| 135 | Sucrose                                                              |                                 |  | <a href="#">HMDB00258</a>                                                                                                                                 | 1 |
| 136 | Maltose                                                              |                                 |  | <a href="#">HMDB00163</a>                                                                                                                                 | 1 |
| 137 | C16:0 Glycerol ester                                                 | C16:0 MG                        |  |                                                                                                                                                           | 1 |
| 138 | 1,2-Diglyceride (Mw 592)                                             | 1,2 DG                          |  |                                                                                                                                                           | 1 |
| 139 | 1,3-Diglyceride (Mw 592)                                             | 1,3 DG                          |  |                                                                                                                                                           | 1 |
| 140 | C18:1 Glycerol ester                                                 | C18:1 MG                        |  |                                                                                                                                                           | 1 |
| 141 | C18:0 Glycerol ester                                                 | C18:0 MG                        |  |                                                                                                                                                           | 1 |

|     |                                                                         |                    |                                                                                                               |   |
|-----|-------------------------------------------------------------------------|--------------------|---------------------------------------------------------------------------------------------------------------|---|
| 142 | 1,2 Diglyceride (Mw 620)                                                | 1,2 DG             |                                                                                                               | 1 |
| 143 | Uric acid                                                               |                    | <a href="#">HMDB00289</a>                                                                                     | 1 |
| 144 | Cholesterol                                                             | Chol               | <a href="#">HMDB00067</a>                                                                                     | 1 |
| 145 | Vitamin E                                                               | Vit E              | <a href="#">HMDB01893</a>                                                                                     | 1 |
| 146 | Angiotensin converting enzyme                                           | ACE                | <a href="#">P12821</a>                                                                                        | 2 |
| 147 | Adiponectin                                                             | ADIPO              | <a href="#">Q15848</a>                                                                                        | 2 |
| 148 | Alpha-1 Antitrypsin                                                     | A1AT               | <a href="#">P01009</a>                                                                                        | 2 |
| 149 | Alpha-2 Macroglobulin                                                   | A2M                | <a href="#">P01023</a>                                                                                        | 2 |
| 150 | Alpha-Fetoprotein                                                       | FETA               | <a href="#">P02771</a>                                                                                        | 2 |
| 151 | Angiotensinogen                                                         | ANGT               | <a href="#">P01019</a>                                                                                        | 2 |
| 152 | Apolipoprotein A1                                                       | APOA1              | <a href="#">P02647</a>                                                                                        | 2 |
| 153 | Apolipoprotein CIII                                                     | APOC3              | <a href="#">P02656</a>                                                                                        | 2 |
| 154 | Apolipoprotein H                                                        | APOH               | <a href="#">P02749</a>                                                                                        | 2 |
| 155 | Agouti-signaling protein                                                | ASIP               | <a href="#">P42127</a>                                                                                        | 2 |
| 156 | Beta-2 Microglobulin                                                    | B2M                | <a href="#">P61769</a>                                                                                        | 2 |
| 157 | Brain-Derived Neurotrophic Factor                                       | BDNF               | <a href="#">P23560</a>                                                                                        | 2 |
| 158 | C Reactive Protein                                                      | CRP                | <a href="#">P02741</a>                                                                                        | 2 |
| 159 | NMDA receptor-regulated protein 1 or Cancer Antigen 19-9                | NARG1 or GA19      | <a href="#">Q9BXJ9</a>                                                                                        | 2 |
| 160 | Tumor necrosis factor receptor superfamily member 5                     | TNR5 or CD40       | <a href="#">P25942</a>                                                                                        | 2 |
| 161 | CD40 Ligand                                                             | CD40L              | <a href="#">P29965</a>                                                                                        | 2 |
| 162 | Complement 3                                                            | CO3                | <a href="#">P01024</a>                                                                                        | 2 |
| 163 | Cortisol                                                                |                    | <a href="#">HMDB00063</a>                                                                                     | 2 |
| 164 | Connective tissue growth factor                                         | CTGF               | <a href="#">P29279</a>                                                                                        | 2 |
| 165 | Epidermal Growth Factor                                                 | EGF                | <a href="#">P01133</a>                                                                                        | 2 |
| 166 | Epidermal Growth Factor Receptor                                        | EGFR               | <a href="#">P00533</a>                                                                                        | 2 |
| 167 | C-X-C motif chemokine 5 or Neutrophil-activating peptide ENA-78         | CXCL5 or ENA78     | <a href="#">P42830</a>                                                                                        | 2 |
| 168 | Protein S100-A12                                                        | S10AC or ENRAGE    | <a href="#">P80511</a>                                                                                        | 2 |
| 169 | Factor VII                                                              | FA7 or F7          | <a href="#">P08709</a>                                                                                        | 2 |
| 170 | Ferritin                                                                | FRI                | <a href="#">P02792</a> or<br><a href="#">P02794</a>                                                           | 2 |
| 171 | Fibrinogen                                                              | FIB                | <a href="#">P02671</a> or<br><a href="#">P02675</a> or<br><a href="#">P02675</a>                              | 2 |
| 172 | Follicle stimulating hormone                                            | FSH                | <a href="#">P01215</a> or<br><a href="#">P01225</a>                                                           | 2 |
| 173 | Glucagon-like peptide 1 active                                          | GLP-1 active       | <a href="#">P01275</a>                                                                                        | 2 |
| 174 | Glucagon-like peptide 1 total                                           | GLP-1 Total        | <a href="#">P01275</a>                                                                                        | 2 |
| 175 | Glucagon                                                                | GLUC               | <a href="#">P01275</a>                                                                                        | 2 |
| 176 | Glutathione S-Transferase A1                                            | GSTA1              | <a href="#">P08263</a>                                                                                        | 2 |
| 177 | Haptoglobin                                                             | HPT                | <a href="#">P00738</a>                                                                                        | 2 |
| 178 | Heparin-binding EGF-like growth factor                                  | HBEGF              | <a href="#">Q99075</a>                                                                                        | 2 |
| 179 | Intercellular adhesion molecule 1                                       | ICAM1              | <a href="#">P05362</a>                                                                                        | 2 |
| 180 | Immunoglobulin alpha                                                    | IgA                | <a href="#">P01876</a> or<br><a href="#">P01877</a>                                                           | 2 |
| 181 | Immunoglobulin mu                                                       | IgM                | <a href="#">P01871</a>                                                                                        | 2 |
| 182 | interleukin 16                                                          | IL16               | <a href="#">Q14005</a>                                                                                        | 2 |
| 183 | interleukin 17 or interleukin 17A                                       | IL17 or IL17A      | <a href="#">Q18552</a>                                                                                        | 2 |
| 184 | interleukin 18                                                          | IL18               | <a href="#">Q14116</a>                                                                                        | 2 |
| 185 | interleukin 1alpha                                                      | IL1A               | <a href="#">P01583</a>                                                                                        | 2 |
| 186 | interleukin 1 receptor antagonist protein                               | IL1RA              | <a href="#">P18510</a>                                                                                        | 2 |
| 187 | interleukin 7                                                           | IL7                | <a href="#">P13232</a>                                                                                        | 2 |
| 188 | interleukin 8                                                           | IL8                | <a href="#">P10145</a>                                                                                        | 2 |
| 189 | Insulin                                                                 | INS                | <a href="#">P01308</a>                                                                                        | 2 |
| 190 | Leptin                                                                  | LEP                | <a href="#">P41159</a>                                                                                        | 2 |
| 191 | Luteinizing hormone                                                     | LSH or LH          | <a href="#">P01215</a> or<br><a href="#">P01229</a>                                                           | 2 |
| 192 | Lipoprotein (a)                                                         | APOA or LPA        | <a href="#">P08519</a>                                                                                        | 2 |
| 193 | Macrophage colony-stimulating factor 1                                  | CSF1 or MCSF       | <a href="#">P09603</a>                                                                                        | 2 |
| 194 | C-C motif chemokine ligand 22 or Macrophage-derived chemokine           | CCL22 or MDC       | <a href="#">Q00626</a>                                                                                        | 2 |
| 195 | C-C motif chemokine ligand 3 or Macrophage inflammatory protein 1-alpha | CCL3 or MIP-1alpha | <a href="#">P10147</a>                                                                                        | 2 |
| 196 | C-C motif chemokine ligand 4 or Macrophage inflammatory protein 1-beta  | CCL4 or MIP-1beta  | <a href="#">P13236</a>                                                                                        | 2 |
| 197 | Matrix metalloproteinase-2 or 72 kDa type IV collagenase                | MMP2               | <a href="#">P08253</a>                                                                                        | 2 |
| 198 | Matrix metalloproteinase-9                                              | MMP9               | <a href="#">P14780</a>                                                                                        | 2 |
| 199 | Myeloperoxidase                                                         | MPO                | <a href="#">P05164</a>                                                                                        | 2 |
| 200 | Myoglobin                                                               | MYG                | <a href="#">P02144</a>                                                                                        | 2 |
| 201 | Plasminogen activator inhibitor 1                                       | SERPINE1 or PAI-1  | <a href="#">P05121</a>                                                                                        | 2 |
| 202 | Pancreatic polypeptide                                                  | PAHO or PP         | <a href="#">P01298</a>                                                                                        | 2 |
| 203 | Platelet-derived growth factor                                          | PDGF               | <a href="#">P04085</a> or<br><a href="#">P01127</a> or<br><a href="#">Q9NRA1</a> or<br><a href="#">Q9GZP0</a> | 2 |
| 204 | Progesterone                                                            |                    | <a href="#">HMDB01830</a>                                                                                     | 2 |
| 205 | Prolactin                                                               | PRL                | <a href="#">P01236</a>                                                                                        | 2 |
| 206 | Prostate Specific Antigen, Free or Kallikrein-3                         | PSA or KLK3        | <a href="#">P07288</a>                                                                                        | 2 |
| 207 | Prostatic Acid Phosphatase                                              | ACPP or PPAP       | <a href="#">P15309</a>                                                                                        | 2 |
| 208 | Peptide YY                                                              | PYY                | <a href="#">P10082</a>                                                                                        | 2 |
| 209 | C-C motif chemokine 5                                                   | CCL5 or RANTES     | <a href="#">P13501</a>                                                                                        | 2 |
| 210 | Resistin                                                                | RETN               | <a href="#">Q9HD89</a>                                                                                        | 2 |
| 211 | Serum Amyloid P                                                         | SAP                | <a href="#">P02743</a>                                                                                        | 2 |
| 212 | Aspartate aminotransferase, cytoplasmic                                 | AATC or SGOT       | <a href="#">P17174</a>                                                                                        | 2 |

|     |                                                                                          |                   |                                                     |   |
|-----|------------------------------------------------------------------------------------------|-------------------|-----------------------------------------------------|---|
| 213 | Sex hormone-binding globulin                                                             | SHBG              | <a href="#">P04278</a>                              | 2 |
| 214 | Kit Ligand or Stem Cell Factor                                                           | KITLG or SCF      | <a href="#">P21583</a>                              | 2 |
| 215 | Tenascin C                                                                               | TENA              | <a href="#">P24821</a>                              | 2 |
| 216 | Testosterone                                                                             |                   | <a href="#">HMDB00234</a>                           | 2 |
| 217 | Thrombospondin-1                                                                         | THBS1             | <a href="#">P07996</a>                              | 2 |
| 218 | Thyroid Stimulating Hormone                                                              | TSH               | <a href="#">P01215</a> or<br><a href="#">P01222</a> | 2 |
| 219 | Thyroxine Binding Globulin                                                               | THBG or SERPINA7  | <a href="#">P05543</a>                              | 2 |
| 220 | Metalloproteinase inhibitor 1                                                            | TIMP-1            | <a href="#">P01033</a>                              | 2 |
| 221 | Tumor necrosis factor receptor superfamily member 1B or Tumor necrosis factor receptor 2 | TNF RII or TNFR1B | <a href="#">P20333</a>                              | 2 |
| 222 | Vascular cell adhesion protein 1                                                         | VCAM-1            | <a href="#">P19320</a>                              | 2 |
| 223 | Vascular endothelial growth factor A                                                     | VEGFA or VEGF     | <a href="#">P15692</a>                              | 2 |
| 224 | von Willebrand Factor                                                                    | VWF               | <a href="#">P04275</a>                              | 2 |
| 225 | Insulin                                                                                  | Ins               | <a href="#">P01308</a>                              | 3 |
| 226 | Glucose                                                                                  | Glc               | <a href="#">HMDB00122</a>                           | 3 |
| 227 | Triglycerides                                                                            | TG                |                                                     | 3 |
| 228 | Non esterified fatty acids                                                               | NEFA              |                                                     | 3 |
| 229 | High sensitive C reactive Protein                                                        | hsCRP             | <a href="#">P02741</a>                              | 3 |
| 230 | Interleukin 6                                                                            | IL6               | <a href="#">P05231</a>                              | 3 |
| 231 | Tumor necrosis factor alpha                                                              | TNFa              | <a href="#">P01375</a>                              | 3 |
